# Supplementary material
Source: publisher figshare collection journal article supplement (https://brill.figshare.com/articles/dataset/_/25144397)
Supplement: Supplementary file 1 [file 2]

## General dynamics of the URT microbiome and microbial signs of recovery in COVID-19 patients

*O. Ignatyeva, V. Gostev, A. Taraskina, I. Tsvetkova, P. Pavlova, O. Sulian, V. Ageevets, D. Likholetova, P. Chulkova, E. Nikitina, L. Matkava, M. Terekhov, D. Lisovaya, D. Kashtanova, M. Ivanov, O. Kalinogorskaya, A. Avdeeva, A. Zhirkov, O. Goleva, S. Zakharenko, K. Zhdanov, V. Strizheletsky, Y. Gomon, A. Kruglov, O. Ni, T. Noskova, I. Gorbova, G. Cherenkova, I. Shlyk, A. Afanasyev, V. Yudin, V. Makarov, S. Sidorenko and S. Yudin*

### Supplementary materials S1. Case report form for COVID-19 patients

Case No.

Sex

Age

Date of admission

Diagnosis

NEWS score

MSCT score (0,1,2,3,4)

Respiratory support at the moment of enrollment:

- Oxygen inhalation;
- High-flow oxygen therapy (FiO<sub>2</sub>, flow rate);
- Non-invasive ventilation (FiO<sub>2</sub>, PEEP)
- Invasive ventilation (FiO<sub>2</sub>, PEEP)

Prone positioning yes/no

Date of connecting the patient to mechanical ventilation

Date of disconnecting the patient from mechanical ventilation

Treatment:

Specific antiviral therapy:

- Plaquenil® + azithromycin;
- Kaletra® + Infibeta®;
- Hyperimmune plasma;
- Other;

Anti-cytokine therapy:

- IL-6 inhibitors;
- Janus kinase inhibitors;
- Other;

Antibiotics (except azithromycin);

Hemodiafiltration;

Cytosorption.

Outcome (date)

Lung lesions: uni-, bilateral; %

Laboratory parameters:

| Parameter                                                                      | Day 0 | Day 5–7 | Day 12–14 |
|--------------------------------------------------------------------------------|-------|---------|-----------|
| Complete blood count (including absolute count of neutrophils and lymphocytes) |       |         |           |
| CRP                                                                            |       |         |           |
| Procalcitonin                                                                  |       |         |           |
| Blood gas analysis                                                             |       |         |           |
| Acid-base balance                                                              |       |         |           |
| Lactate                                                                        |       |         |           |
| Glucose                                                                        |       |         |           |
| Creatinine                                                                     |       |         |           |
| Fibrinogen                                                                     |       |         |           |
| D-dimer                                                                        |       |         |           |

**Table S1.** ddPCR reaction mixture.

| Components                   | Amount per one reaction (20 $\mu$ L) | Final concentration |
|------------------------------|--------------------------------------|---------------------|
| 2x ddPCR Supermix for probes | 10 $\mu$ L                           | 1x                  |
| 20 $\mu$ M primer F          | 1 $\mu$ L                            | 1000 nM             |
| 20 $\mu$ M primer R          | 1 $\mu$ L                            | 1000 nM             |
| 10 $\mu$ M probe (FAM)       | 0.56 $\mu$ L                         | 278 nM              |
| cDNA                         | 6 $\mu$ L                            | To 330 ng           |
| diH <sub>2</sub> O           | 1.44 $\mu$ L                         | -                   |

**Table S2.** Amplification protocol for ddPCR.

| Temperature, °C | Time     | Number of cycles |
|-----------------|----------|------------------|
| 95              | 10 min   | 1                |
| 94              | 30 sec   | 40               |
| 54              | 60 sec   |                  |
| 98              | 10 min   | 1                |
| 4               | $\infty$ | 1                |

**Table S3.** Most abundant genera in the upper respiratory tract microbiome of the COVID-19 patients and controls.

| COVID-19 patients          |                       | healthy individuals        |                       |
|----------------------------|-----------------------|----------------------------|-----------------------|
| genera                     | relative abundance, % | genera                     | relative abundance, % |
| <i>Prevotella</i>          | 26.79                 | <i>Prevotella</i>          | 29.48                 |
| <i>Streptococcus</i>       | 23.69                 | <i>Streptococcus</i>       | 16.00                 |
| <i>Veillonella</i>         | 13.44                 | <i>Veillonella</i>         | 11.72                 |
| <i>Leptotrichia</i>        | 2.83                  | <i>Haemophilus</i>         | 6.52                  |
| <i>Granulicatella</i>      | 2.54                  | <i>Neisseria</i>           | 5.84                  |
| <i>Rothia</i>              | 2.44                  | <i>Leptotrichia</i>        | 4.18                  |
| <i>Gemella</i>             | 1.85                  | <i>Fusobacterium</i>       | 3.23                  |
| <i>Neisseria</i>           | 1.76                  | <i>Limosilactobacillus</i> | 3.17                  |
| <i>Staphylococcus</i>      | 1.74                  | <i>Porphyromonas</i>       | 2.28                  |
| <i>Haemophilus</i>         | 1.59                  | <i>Rothia</i>              | 1.49                  |
| <i>Fusobacterium</i>       | 1.59                  | <i>Granulicatella</i>      | 1.07                  |
| <i>Limosilactobacillus</i> | 1.03                  | <i>Gemella</i>             | 0.80                  |
| <i>Porphyromonas</i>       | 1.31                  | <i>Staphylococcus</i>      | 0.40                  |
| Other                      | 17.40                 | Other                      | 13.82                 |

**Table S4.** Unique representatives of the upper respiratory tract microbiome in the COVID-19 patients upon their admission to hospital (at TP0) and controls.

| Bacterial genera unique for COVID-19 patients at TP0 (n = 47) |                  |                | Bacterial genera unique for healthy individuals (n = 2) |                  |                |
|---------------------------------------------------------------|------------------|----------------|---------------------------------------------------------|------------------|----------------|
| Genera                                                        | % of individuals | Mean abundance | Genera                                                  | % of individuals | Mean abundance |
| <i>Olsenella</i>                                              | 7.84             | 0.29           | <i>Oblitimonas</i>                                      | 3.66             | 5.28           |
| <i>Moraxella</i>                                              | 1.12             | 17.14          | <i>Aeromonas</i>                                        | 1.22             | 0.17           |
| <i>Psychrobacter</i>                                          | 2.61             | 0.33           |                                                         |                  |                |
| <i>Comamonas</i>                                              | 2.24             | 0.21           |                                                         |                  |                |
| <i>Rhodococcus</i>                                            | 2.24             | 0.18           |                                                         |                  |                |
| <i>Listeria</i>                                               | 0.75             | 0.60           |                                                         |                  |                |
| <i>Schwartzia</i>                                             | 10.07            | 0.15           |                                                         |                  |                |
| <i>Sphingobium</i>                                            | 1.12             | 0.21           |                                                         |                  |                |
| <i>Actinomarinicola</i>                                       | 1.49             | 0.12           |                                                         |                  |                |
| <i>Scardovia</i>                                              | 8.58             | 0.19           |                                                         |                  |                |
| <i>Pediococcus</i>                                            | 1.12             | 1.02           |                                                         |                  |                |
| <i>Paucibacter</i>                                            | 1.12             | 0.40           |                                                         |                  |                |
| <i>Tatumella</i>                                              | 0.75             | 0.47           |                                                         |                  |                |
| <i>Oryzobacter</i>                                            | 0.75             | 0.11           |                                                         |                  |                |
| <i>Zavarzinella</i>                                           | 0.75             | 0.21           |                                                         |                  |                |
| <i>Nosocomiicoccus</i>                                        | 1.87             | 0.21           |                                                         |                  |                |
| <i>Oscillibacter</i>                                          | 0.75             | 0.17           |                                                         |                  |                |
| <i>Vibrio</i>                                                 | 0.37             | 0.11           |                                                         |                  |                |
| <i>Pantoea</i>                                                | 0.75             | 0.12           |                                                         |                  |                |
| <i>Serratia</i>                                               | 4.85             | 5.04           |                                                         |                  |                |
| <i>Rickettsia</i>                                             | 4.48             | 0.17           |                                                         |                  |                |
| <i>Raoultella</i>                                             | 0.75             | 0.43           |                                                         |                  |                |
| <i>Savagea</i>                                                | 0.37             | 0.22           |                                                         |                  |                |
| <i>Salmonella</i>                                             | 5.22             | 0.90           |                                                         |                  |                |
| <i>Ruminococcus2</i>                                          | 0.75             | 0.20           |                                                         |                  |                |
| <i>Ruminococcus</i>                                           | 0.37             | 0.93           |                                                         |                  |                |
| <i>Solibacillus</i>                                           | 0.37             | 0.11           |                                                         |                  |                |
| <i>Proteus</i>                                                | 0.75             | 1.00           |                                                         |                  |                |
| <i>Caulobacter</i>                                            | 0.75             | 0.41           |                                                         |                  |                |
| <i>Brochothrix</i>                                            | 1.87             | 0.18           |                                                         |                  |                |
| <i>Desulfobulbus</i>                                          | 2.61             | 0.11           |                                                         |                  |                |
| <i>Dechloromonas</i>                                          | 0.37             | 0.11           |                                                         |                  |                |
| <i>Dermabacter</i>                                            | 1.49             | 0.22           |                                                         |                  |                |
| <i>Akkermansia</i>                                            | 1.12             | 0.10           |                                                         |                  |                |
| <i>Acidovorax</i>                                             | 1.87             | 1.41           |                                                         |                  |                |
| <i>Blautia</i>                                                | 0.75             | 0.15           |                                                         |                  |                |
| <i>Lentilactobacillus</i>                                     | 2.24             | 0.18           |                                                         |                  |                |
| <i>Kosakonia</i>                                              | 1.12             | 0.17           |                                                         |                  |                |
| <i>Lampropedia</i>                                            | 1.12             | 0.12           |                                                         |                  |                |
| <i>Lactiplantibacillus</i>                                    | 10.07            | 0.52           |                                                         |                  |                |
| <i>Methylobacterium</i>                                       | 19.78            | 1.11           |                                                         |                  |                |

|                            |      |      |  |  |  |
|----------------------------|------|------|--|--|--|
| <i>Melaminivora</i>        | 1.87 | 0.11 |  |  |  |
| <i>Flexilinea</i>          | 1.49 | 0.11 |  |  |  |
| <i>Flectobacillus</i>      | 0.37 | 3.21 |  |  |  |
| <i>Intestinibacter</i>     | 0.37 | 0.23 |  |  |  |
| <i>Fructilactobacillus</i> | 0.75 | 0.24 |  |  |  |
| <i>Geobacillus</i>         | 1.12 | 0.16 |  |  |  |

Note. TP0: time-point 0

**Table S5.** Unique and representatives of the upper respiratory tract microbiome in the COVID-19 patients at TP1 and controls.

| Bacterial genera unique for COVID-19 patients at TP1 (n = 46) |                  |                | Bacterial genera unique for healthy individuals (n = 3) |                  |                |
|---------------------------------------------------------------|------------------|----------------|---------------------------------------------------------|------------------|----------------|
| Genera                                                        | % of individuals | Mean abundance | Genera                                                  | % of individuals | Mean abundance |
| <i>Facklamia</i>                                              | 1.80             | 0.61           | <i>Oblitimonas</i>                                      | 3.66             | 5.28           |
| <i>Novosphingobium</i>                                        | 4.05             | 0.16           | <i>Dolosigranulum</i>                                   | 2.44             | 0.26           |
| <i>Olsenella</i>                                              | 3.15             | 0.11           | <i>Duncaniella</i>                                      | 1.22             | 0.24           |
| <i>Moraxella</i>                                              | 0.45             | 11.70          |                                                         |                  |                |
| <i>Psychrobacter</i>                                          | 1.80             | 3.51           |                                                         |                  |                |
| <i>Rhodoferrax</i>                                            | 1.35             | 0.17           |                                                         |                  |                |
| <i>Fluviicola</i>                                             | 1.80             | 0.14           |                                                         |                  |                |
| <i>Legionella</i>                                             | 0.90             | 0.11           |                                                         |                  |                |
| <i>Listeria</i>                                               | 2.70             | 0.28           |                                                         |                  |                |
| <i>Jeotgalicoccus</i>                                         | 1.35             | 0.27           |                                                         |                  |                |
| <i>Schwartzia</i>                                             | 4.05             | 0.13           |                                                         |                  |                |
| <i>Sphingobacterium</i>                                       | 1.35             | 0.20           |                                                         |                  |                |
| <i>Scardovia</i>                                              | 1.80             | 0.28           |                                                         |                  |                |
| <i>Tepidiphilus</i>                                           | 0.90             | 0.17           |                                                         |                  |                |
| <i>Terrimonas</i>                                             | 1.80             | 0.14           |                                                         |                  |                |
| <i>Thermus</i>                                                | 0.45             | 0.95           |                                                         |                  |                |
| <i>Oryzobacter</i>                                            | 0.45             | 0.29           |                                                         |                  |                |
| <i>Xanthomonas</i>                                            | 1.80             | 0.12           |                                                         |                  |                |
| <i>Oscillibacter</i>                                          | 0.45             | 0.18           |                                                         |                  |                |
| <i>Parascardovia</i>                                          | 0.45             | 0.23           |                                                         |                  |                |
| <i>Serratia</i>                                               | 3.60             | 7.41           |                                                         |                  |                |
| <i>Rickettsia</i>                                             | 4.50             | 0.28           |                                                         |                  |                |
| <i>Savagea</i>                                                | 1.35             | 0.46           |                                                         |                  |                |
| <i>Salmonella</i>                                             | 7.66             | 1.02           |                                                         |                  |                |
| <i>Schleiferilactobacillus</i>                                | 0.45             | 0.23           |                                                         |                  |                |
| <i>Spiroplasma</i>                                            | 1.80             | 0.12           |                                                         |                  |                |
| <i>Ralstonia</i>                                              | 2.25             | 0.25           |                                                         |                  |                |
| <i>Proteus</i>                                                | 0.45             | 3.93           |                                                         |                  |                |
| <i>Pseudoglutamicibacter</i>                                  | 0.90             | 1.20           |                                                         |                  |                |
| <i>Caulobacter</i>                                            | 0.90             | 0.18           |                                                         |                  |                |

|                            |       |      |  |  |  |
|----------------------------|-------|------|--|--|--|
| <i>Dechloromonas</i>       | 0.45  | 0.55 |  |  |  |
| <i>Curvibacter</i>         | 7.66  | 0.20 |  |  |  |
| <i>Dermabacter</i>         | 1.80  | 0.16 |  |  |  |
| <i>Altererythrobacter</i>  | 0.45  | 0.37 |  |  |  |
| <i>Acidovorax</i>          | 2.70  | 0.34 |  |  |  |
| <i>Aerococcus</i>          | 1.35  | 0.40 |  |  |  |
| <i>Atopostipes</i>         | 0.90  | 0.16 |  |  |  |
| <i>Barnesiella</i>         | 0.45  | 0.15 |  |  |  |
| <i>Kosakonia</i>           | 3.15  | 0.10 |  |  |  |
| <i>Lactiplantibacillus</i> | 4.05  | 0.25 |  |  |  |
| <i>Methylobacterium</i>    | 17.12 | 1.74 |  |  |  |
| <i>Melaminivora</i>        | 1.35  | 0.14 |  |  |  |
| <i>Flectobacillus</i>      | 0.90  | 0.21 |  |  |  |
| <i>Fannyhessea</i>         | 4.05  | 0.36 |  |  |  |
| <i>Glutamicibacter</i>     | 0.90  | 0.25 |  |  |  |
| <i>Geodermatophilus</i>    | 0.45  | 0.22 |  |  |  |
|                            |       |      |  |  |  |

Note. TP1: time-point 1 (after a median of 5.0 days since admission to hospital)

**Table S6.** Unique representatives of the upper respiratory tract microbiome in the COVID-19 patients at TP2 and controls.

| Bacterial genera unique for COVID-19 patients at TP2 (n = 37) |                  |                | Bacterial genera unique for healthy individuals (n = 1) |                  |                |
|---------------------------------------------------------------|------------------|----------------|---------------------------------------------------------|------------------|----------------|
| Genera                                                        | % of individuals | Mean abundance | Genera                                                  | % of individuals | Mean abundance |
| <i>Facklamia</i>                                              | 1.14             | 0.10           | <i>Dolosigranulum</i>                                   | 2.44             | 0.26           |
| <i>Novosphingobium</i>                                        | 2.29             | 0.21           |                                                         |                  |                |
| <i>Psychrobacter</i>                                          | 3.43             | 0.15           |                                                         |                  |                |
| <i>Comamonas</i>                                              | 2.29             | 0.12           |                                                         |                  |                |
| <i>Rhodobacter</i>                                            | 1.14             | 0.50           |                                                         |                  |                |
| <i>Fluviicola</i>                                             | 4.57             | 0.13           |                                                         |                  |                |
| <i>Listeria</i>                                               | 4.00             | 0.52           |                                                         |                  |                |
| <i>Cryptomonadaceae</i>                                       | 0.57             | 0.11           |                                                         |                  |                |
| <i>Scardovia</i>                                              | 3.43             | 0.13           |                                                         |                  |                |
| <i>Pediococcus</i>                                            | 1.14             | 1.23           |                                                         |                  |                |
| <i>Terrimonas</i>                                             | 2.29             | 0.12           |                                                         |                  |                |
| <i>Wautersiella</i>                                           | 0.57             | 0.14           |                                                         |                  |                |
| <i>Xanthomonas</i>                                            | 1.71             | 0.19           |                                                         |                  |                |
| <i>Parascardovia</i>                                          | 0.57             | 0.60           |                                                         |                  |                |
| <i>Ureibacillus</i>                                           | 0.57             | 0.18           |                                                         |                  |                |
| <i>Vibrio</i>                                                 | 0.57             | 0.20           |                                                         |                  |                |
| <i>Serratia</i>                                               | 4.00             | 12.53          |                                                         |                  |                |
| <i>Rickettsia</i>                                             | 20.00            | 0.11           |                                                         |                  |                |
| <i>Sediminibacterium</i>                                      | 0.57             | 0.37           |                                                         |                  |                |
| <i>Salmonella</i>                                             | 8.00             | 1.47           |                                                         |                  |                |
| <i>Solibacillus</i>                                           | 0.57             | 0.19           |                                                         |                  |                |
| <i>Ralstonia</i>                                              | 6.29             | 0.13           |                                                         |                  |                |
| <i>Pseudarcicella</i>                                         | 0.57             | 2.01           |                                                         |                  |                |
| <i>Proteus</i>                                                | 0.57             | 0.11           |                                                         |                  |                |
| <i>Pseudogracilibacillus</i>                                  | 1.71             | 0.13           |                                                         |                  |                |
| <i>Caulobacter</i>                                            | 1.71             | 0.14           |                                                         |                  |                |
| <i>Chlorophyta</i>                                            | 0.57             | 0.27           |                                                         |                  |                |
| <i>Brochothrix</i>                                            | 2.86             | 0.82           |                                                         |                  |                |
| <i>Aerococcus</i>                                             | 0.57             | 0.10           |                                                         |                  |                |
| <i>Blastocatella</i>                                          | 0.57             | 0.21           |                                                         |                  |                |
| <i>Asprobacter</i>                                            | 1.14             | 0.15           |                                                         |                  |                |
| <i>Macrococcus</i>                                            | 0.57             | 0.19           |                                                         |                  |                |
| <i>Kytococcus</i>                                             | 0.57             | 0.23           |                                                         |                  |                |
| <i>Methylobacterium</i>                                       | 12.00            | 1.50           |                                                         |                  |                |
| <i>Fannyhessea</i>                                            | 1.14             | 0.21           |                                                         |                  |                |
| <i>Herbaspirillum</i>                                         | 1.71             | 0.55           |                                                         |                  |                |
| <i>Intestinibacter</i>                                        | 0.57             | 0.14           |                                                         |                  |                |

Note. TP2: time-point 2 (after a median of 12.0 days since admission to hospital)

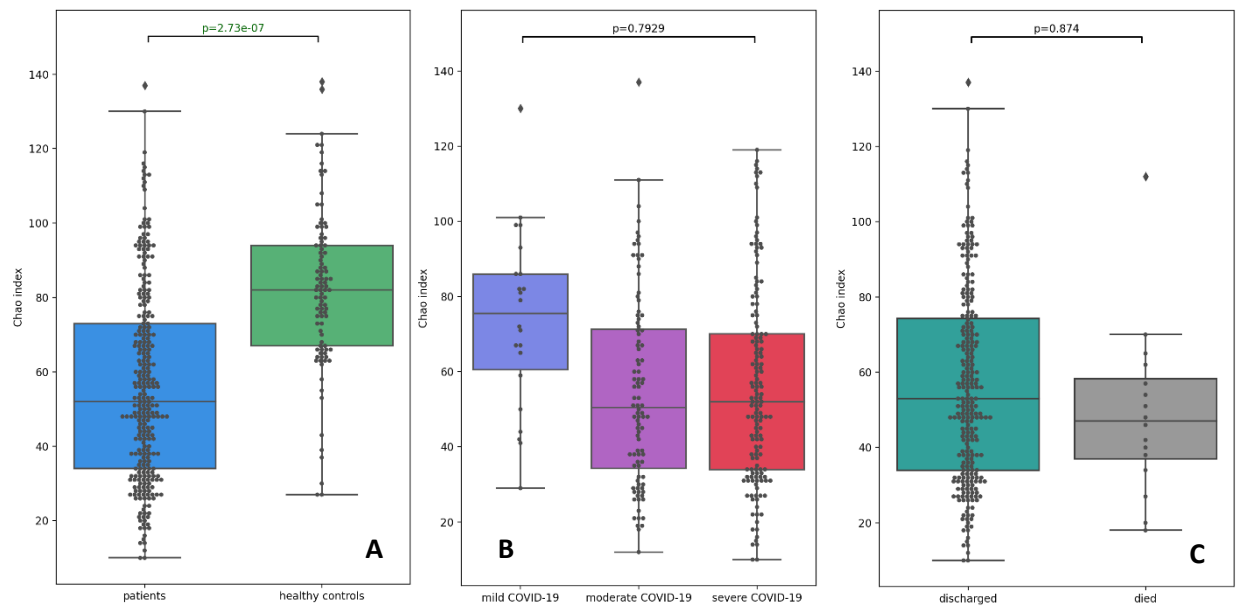

**Figure S1.** Comparison of the Chao indices of the upper respiratory tract microbiota between the patients and controls (A); patients with mild, moderate, and severe COVID-19 (B); discharged and deceased patients (C).

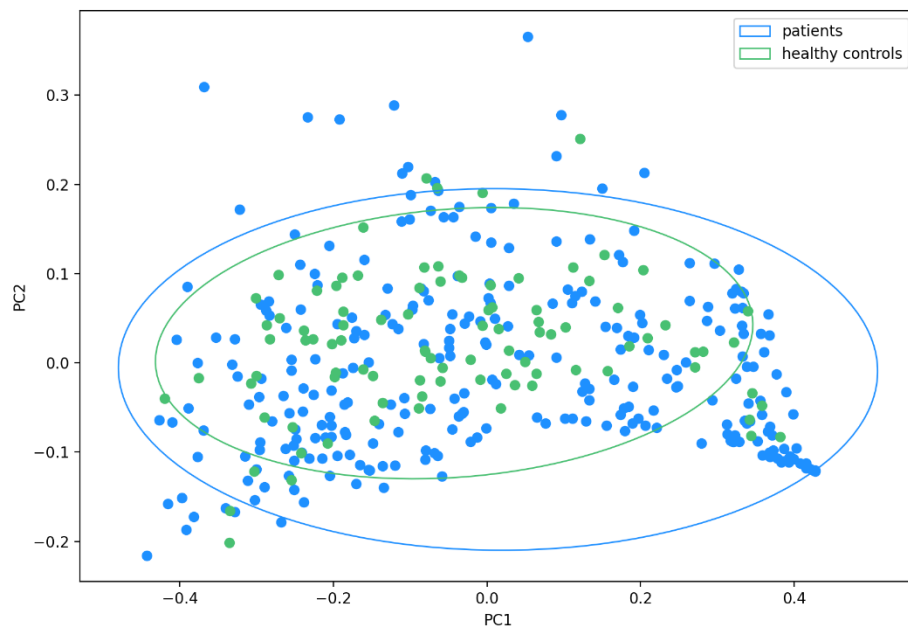

**Figure S2.** The Unifrac distances between the patients' and controls' upper respiratory tract microbiota. No significant difference in the microbial composition was observed between the patients and controls both along PC1 and PC2 ( $P = 0.83$  and  $P = 0.21$ , respectively).



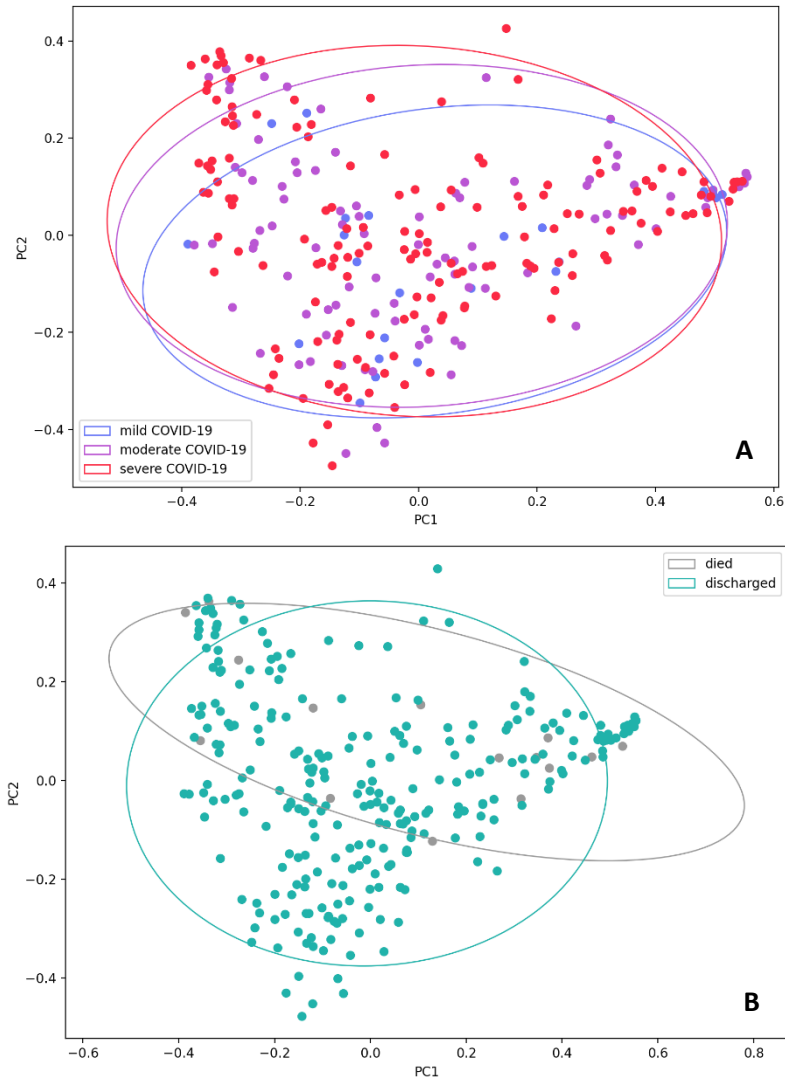

**Figure S3.** The Bray-Curtis dissimilarity between the upper respiratory tract microbiota of the patients with mild, moderate, and severe COVID-19 (A) and discharged or deceased patients (B). No evidence of sample clustering dependent on disease severity (PC1,  $P = 0.68$ ; PC2,  $P = 0.96$ ) or treatment outcome (PC1,  $P = 1.00$ ; PC2,  $P = 0.72$ ) was observed.

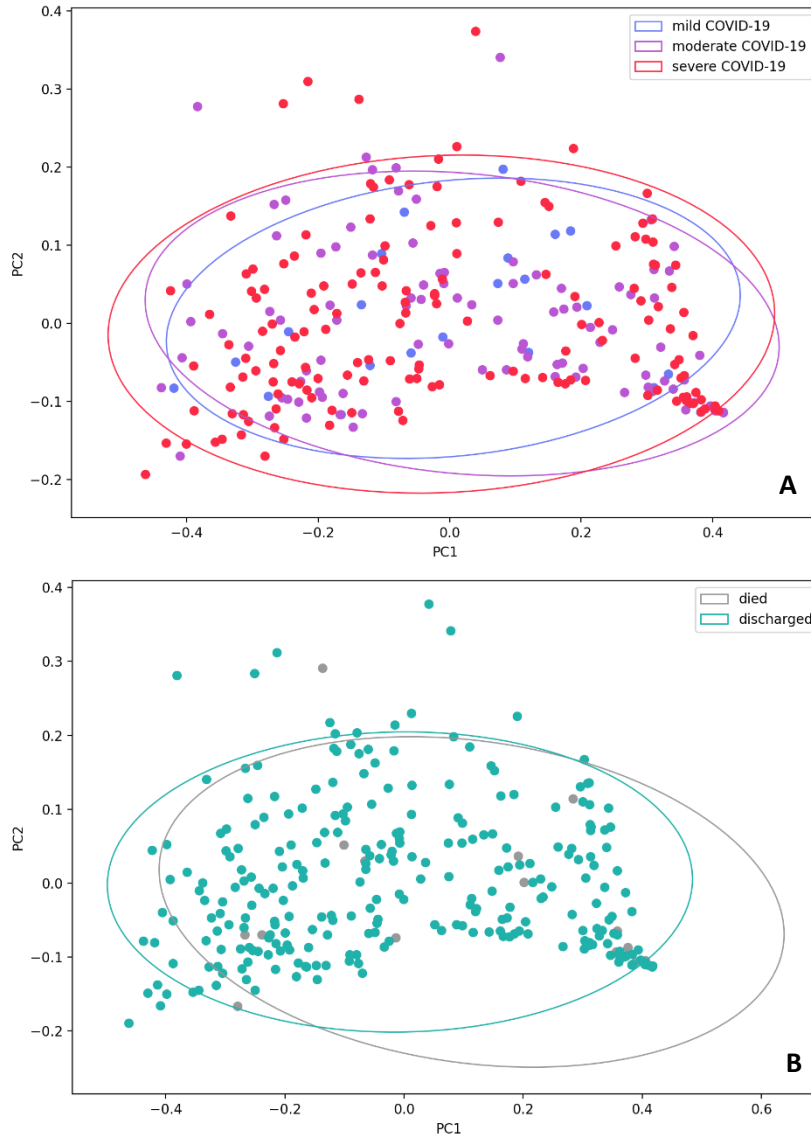

**Figure S4.** Unifrac distances of the upper respiratory tract microbiota in patients with mild, moderate, and severe COVID-19 pneumonia (A), and patients discharged from hospital or died (B). There was no evidence of samples' clustering by pneumonia severity ( $P = 0.40$  on PC1;  $P = 0.75$  on PC2) or treatment outcome ( $P = 0.62$  on PC1;  $P = 0.83$  on PC2).

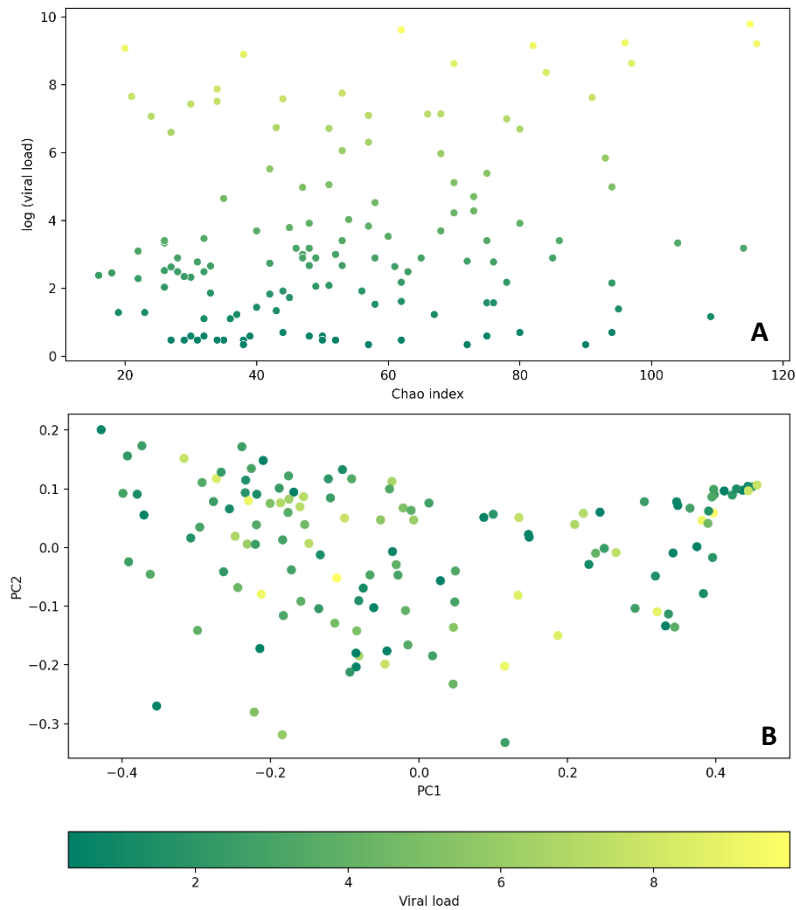

**Figure S5.** Relationship between SARS-CoV-2 viral load and diversity metrics of the upper respiratory tract microbiota in the COVID-19 patients. (A) The plot showing no association between the Chao  $\alpha$ -diversity indices and the log values of SARS-CoV-2 viral load ( $P = 0.25$ ). (B) The PCA plot of the Unifrac dissimilarity showing no SARS-CoV-2 viral load dependent clustering of the samples load (PC1,  $P = 0.74$ ; PC2,  $P = 0.86$ ). Each dot represents a sample, with the intensity of its color corresponding to the SARS-CoV-2 viral load in copies/mL (see the color scale under the plot).

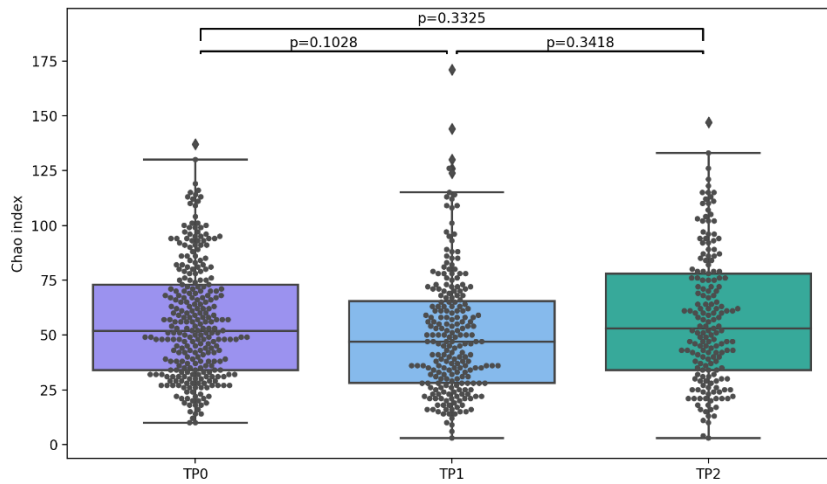

**Figure S6.** The dynamics of Chao indices in the COVID-19 patients during their treatment. TP0: time-point 0 (upon admission to the hospital); TP1: time-point 1 (after a median of 5.0 days); TP2: time-point 2 (after a median of 12.0 days).

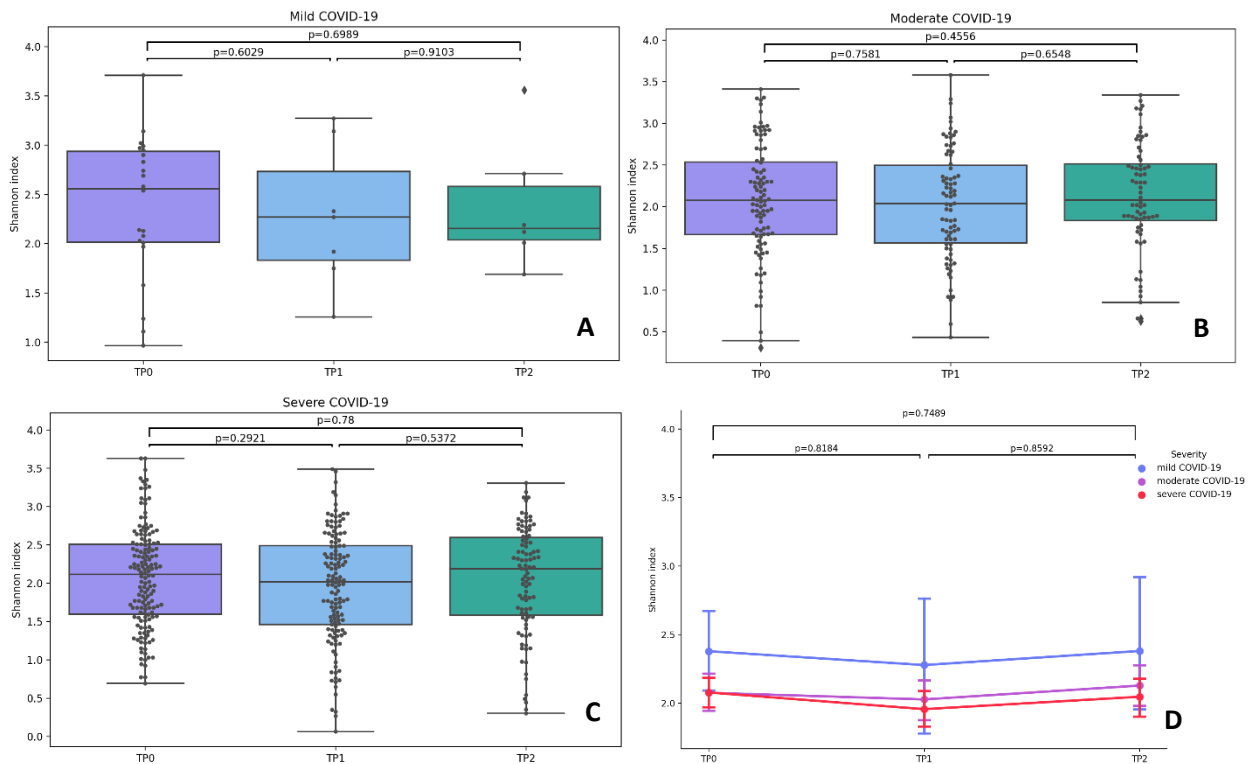

**Figure S7.** Changes in the Shannon indices of the upper respiratory tract microbiota in the patients with mild (A), moderate (B), and severe (C) COVID-19 throughout their treatment. TP0: time-point 0 (upon admission to the hospital); TP: time-point 1 (after a median of 5.0 days); TP2: time-point 2 (after a median of 12.0 days). (D) Comparison of the rates of change in the Shannon indices between the patients with mild, moderate, and severe COVID-19.

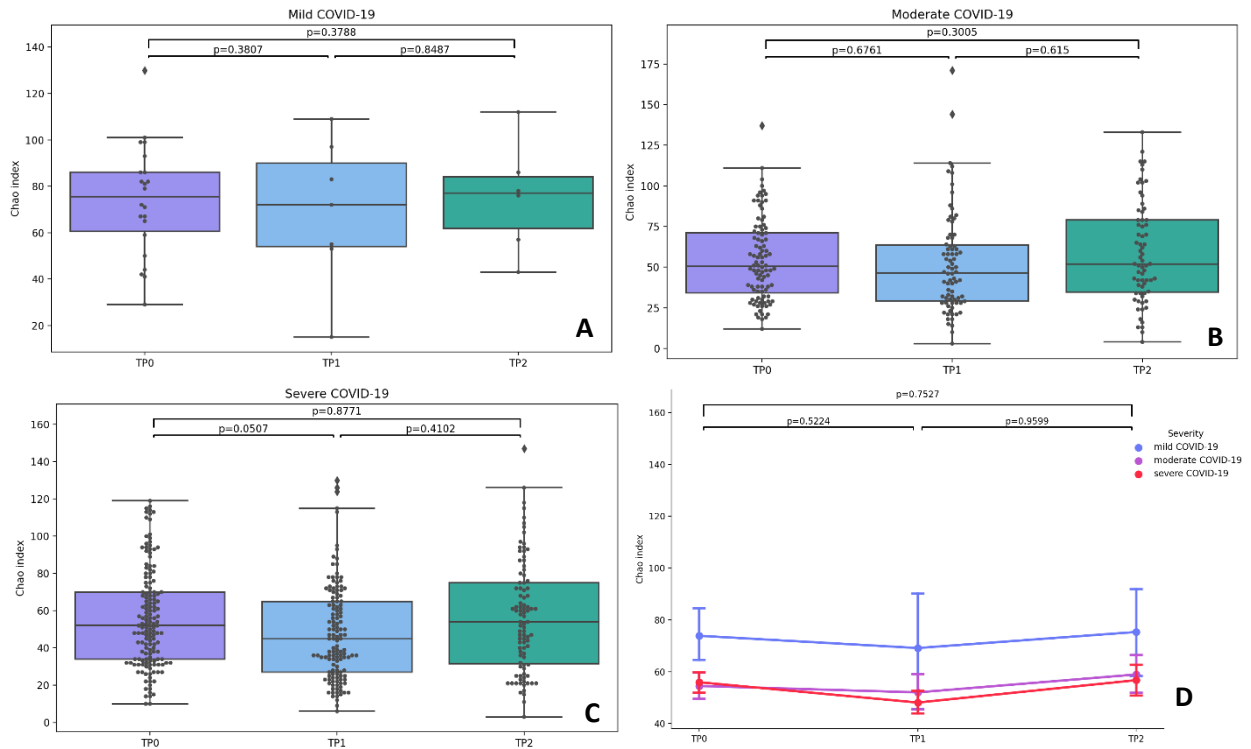

**Figure S8.** Changes in the Chao indices of the upper respiratory tract microbiota in the patients with mild (A), moderate (B), and severe (C) COVID-19 throughout their treatment. TP0: time-point 0 (upon admission to the hospital); TP: time-point 1 (after a median of 5.0 days); TP2: time-point 2 (after a median of 12.0 days). (D) Comparison of the rates of change in the Chao indices between the patients with mild, moderate, and severe COVID-19.

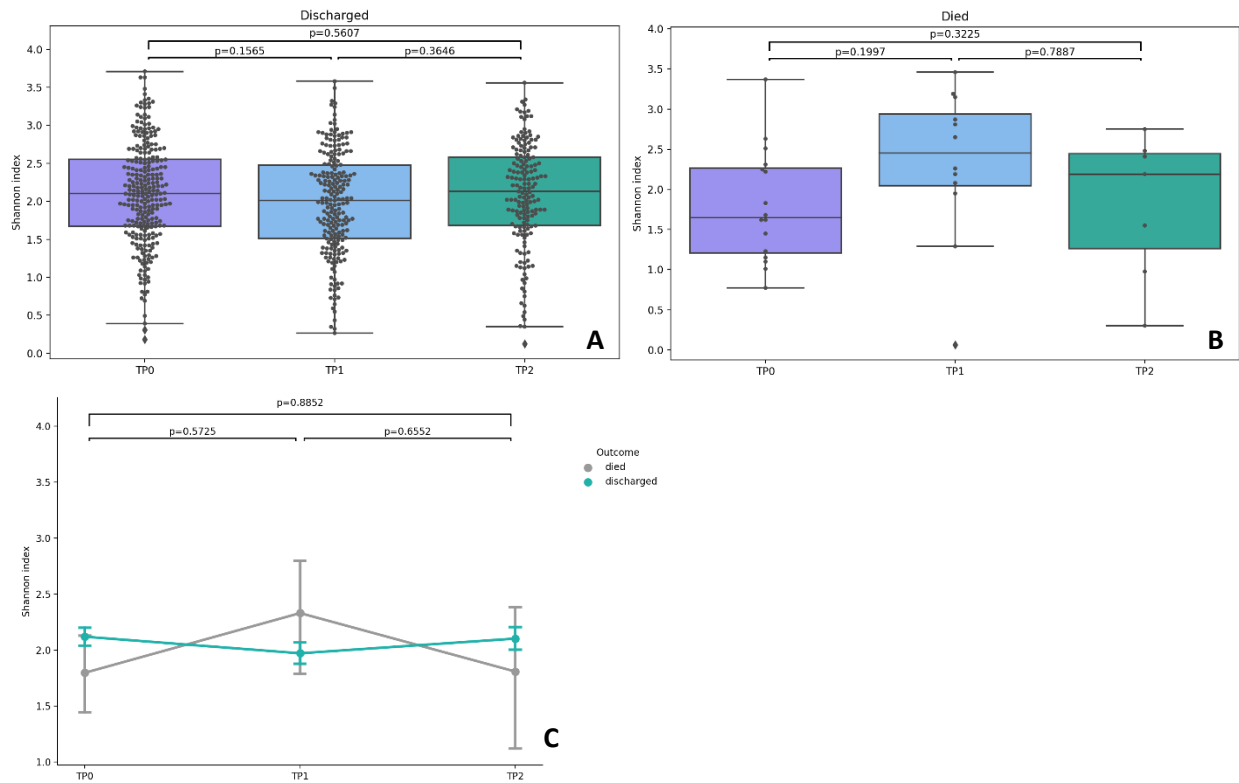

**Figure S9.** Changes in the Shannon indices of the upper respiratory tract microbiota in the discharged (A) and deceased (B) patients. TP0: time-point 0 (upon admission to the hospital); TP: time-point 1 (after a median of 5.0 days); TP2: time-point 2 (after a median of 12.0 days). (D) Comparison of the rates of change in the Shannon indices between the discharged and deceased patients.

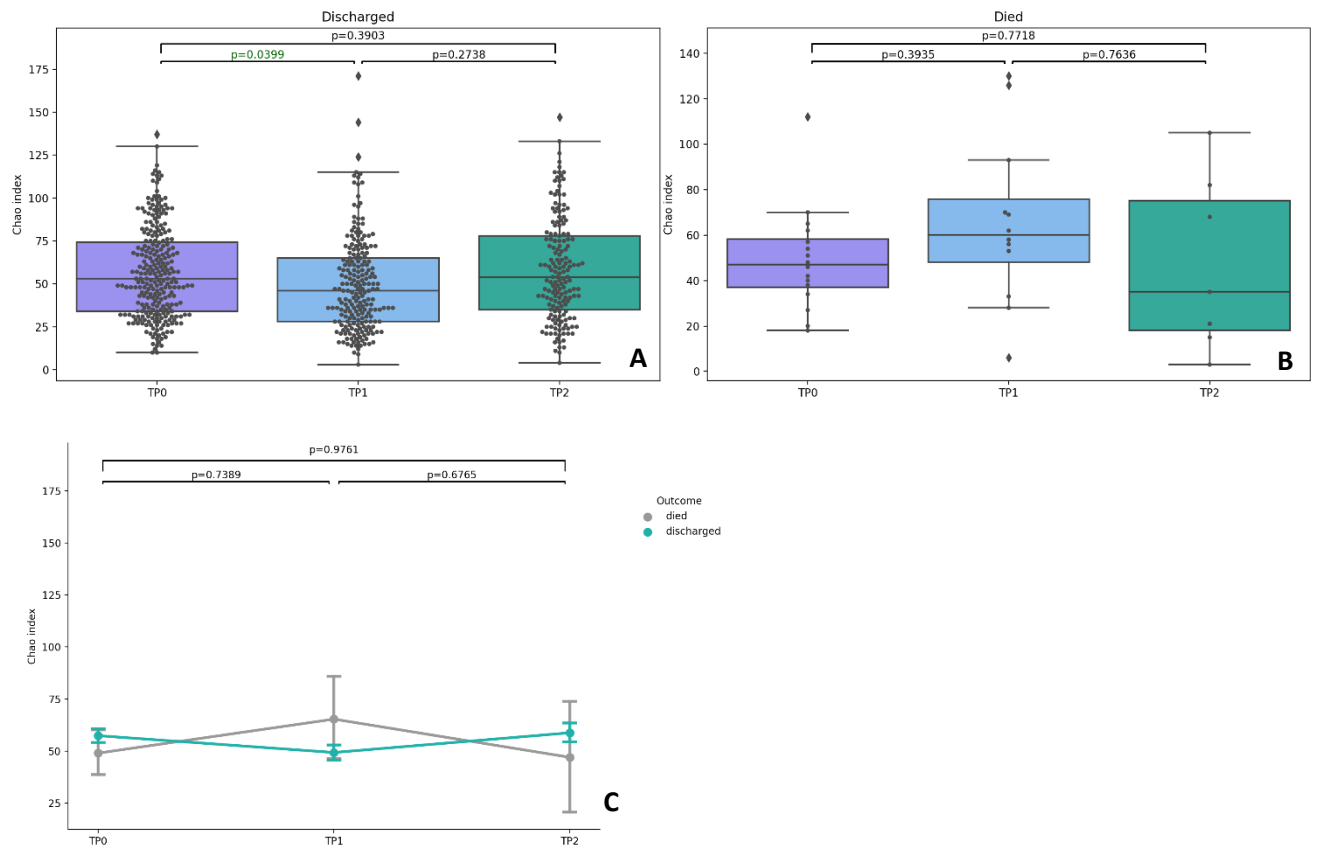

**Figure S10.** Changes in the Chao indices of the upper respiratory tract microbiota in the discharged (A) and deceased (B) patients. TP0: time-point 0 (upon admission to the hospital); TP: time-point 1 (after a median of 5.0 days); TP2: time-point 2 (after a median of 12.0 days). (D) Comparison of the rates of change in the Chao indices of between the discharged and deceased patients.

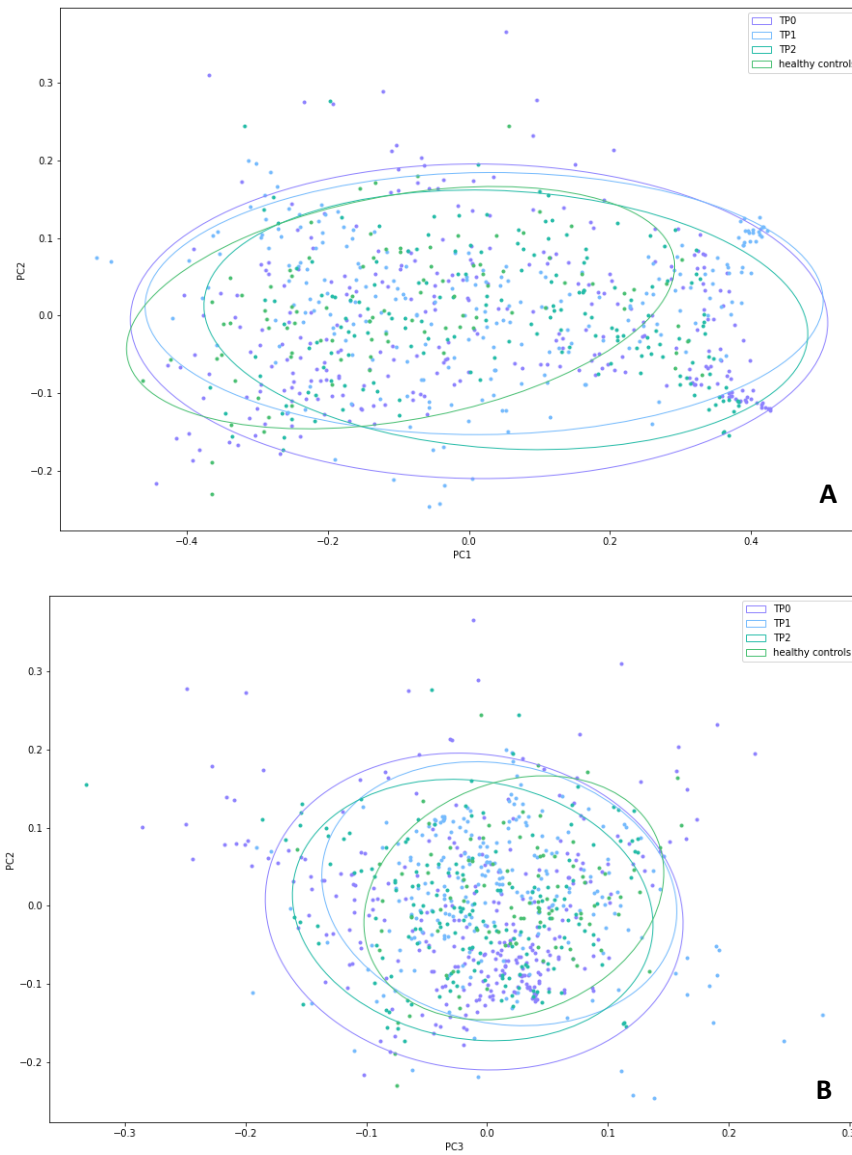

**Figure S11.** The Unifrac distances between the upper respiratory microbiota in the patient samples collected at different time-points during their treatment and control samples. (A) The Unifrac distances plotted along PC1 and PC2. (B) The Unifrac distances plotted along PC2 and PC3. No significant differences were observed at any TP between the patient and control samples. TP0: time-point 0 (upon admission to the hospital); TP1: time-point 1 (after a median of 5.0 days); TP2: time-point 2 (after a median of 12.0 days).



**Table S7.** Inter-time-point changes in the relative abundance of various upper respiratory tract microorganisms in the COVID-19 patients.

| Microorganism           | Between TP0 and TP1 |        |                                       |                                     | Between TP1 and TP2 |        |                                       |                                     | Between TP0 and TP2 |        |                                       |                                     |
|-------------------------|---------------------|--------|---------------------------------------|-------------------------------------|---------------------|--------|---------------------------------------|-------------------------------------|---------------------|--------|---------------------------------------|-------------------------------------|
|                         | RC                  | Log-RC | Bonferroni-unadjusted <i>p</i> -value | Bonferroni-adjusted <i>p</i> -value | RC                  | Log-RC | Bonferroni-unadjusted <i>p</i> -value | Bonferroni-adjusted <i>p</i> -value | RC                  | Log-RC | Bonferroni-unadjusted <i>p</i> -value | Bonferroni-adjusted <i>p</i> -value |
| <i>Acinetobacter</i>    | 0.95                | -0.05  | 0.87                                  | 1.00                                | 3.15                | 1.15   | 2.82e-03                              | 0.80                                | 3.59                | 1.28   | 4.96e-04                              | 0.14                                |
| <i>Actinomarinicola</i> | 0.88                | -0.13  | 0.04                                  | 1.00                                | 1.07                | 0.07   | 0.16                                  | 1.00                                | 0.91                | -0.10  | 0.30                                  | 1.00                                |
| <i>Actinomyces</i>      | 0.32                | -1.15  | 6.56e-04                              | 0.19                                | 3.03                | 1.11   | 2.41e-03                              | 0.68                                | 0.82                | -0.20  | 0.61                                  | 1.00                                |
| <i>Aggregatibacter</i>  | 1.17                | 0.15   | 0.46                                  | 1.00                                | 2.10                | 0.74   | 0.01                                  | 1.00                                | 2.58                | 0.95   | 9.33e-04                              | 0.26                                |
| <i>Alloprevotella</i>   | 0.84                | -0.17  | 0.60                                  | 1.00                                | 2.57                | 0.94   | 0.02                                  | 1.00                                | 1.84                | 0.61   | 0.12                                  | 1.00                                |
| <i>Anaeroglobus</i>     | 0.49                | -0.72  | 9.51e-05                              | 0.03                                | 0.94                | -0.06  | 0.66                                  | 1.00                                | 0.51                | -0.67  | 1.27e-03                              | 0.36                                |
| <i>Aquabacterium</i>    | 1.12                | 0.11   | 0.25                                  | 1.00                                | 0.74                | -0.30  | 0.01                                  | 1.00                                | 0.92                | -0.08  | 0.16                                  | 1.00                                |
| <i>Bifidobacterium</i>  | 0.51                | -0.66  | 1.07e-03                              | 0.30                                | 0.93                | -0.07  | 0.70                                  | 1.00                                | 0.45                | -0.80  | 6.98e-04                              | 0.20                                |
| <i>Bradyrhizobium</i>   | 0.83                | -0.19  | 0.04                                  | 1.00                                | 1.60                | 0.47   | 1.88e-03                              | 0.53                                | 1.42                | 0.35   | 0.03                                  | 1.00                                |
| <i>Bulleidia</i>        | 0.93                | -0.07  | 0.30                                  | 1.00                                | 1.45                | 0.37   | 0.01                                  | 1.00                                | 1.42                | 0.35   | 0.01                                  | 1.00                                |
| <i>Campylobacter</i>    | 0.58                | -0.54  | 0.08                                  | 1.00                                | 2.32                | 0.84   | 0.03                                  | 1.00                                | 0.87                | -0.14  | 0.70                                  | 1.00                                |
| <i>Capnocytophaga</i>   | 0.39                | -0.95  | 3.10e-03                              | 0.88                                | 1.92                | 0.65   | 0.07                                  | 1.00                                | 0.51                | -0.67  | 0.10                                  | 1.00                                |
| <i>Catonella</i>        | 1.01                | 0.01   | 0.96                                  | 1.00                                | 2.18                | 0.78   | 0.02                                  | 1.00                                | 1.76                | 0.56   | 0.10                                  | 1.00                                |
| <i>Chryseobacterium</i> | 1.20                | 0.18   | 0.45                                  | 1.00                                | 1.95                | 0.67   | 0.03                                  | 1.00                                | 2.17                | 0.77   | 0.01                                  | 1.00                                |
| <i>Corynebacterium</i>  | 0.64                | -0.45  | 0.17                                  | 1.00                                | 3.44                | 1.24   | 1.72e-03                              | 0.49                                | 1.82                | 0.60   | 0.08                                  | 1.00                                |
| <i>Desulfobulbus</i>    | 0.88                | -0.13  | 0.05                                  | 1.00                                | 1.04                | 0.04   | 0.32                                  | 1.00                                | 0.88                | -0.12  | 0.14                                  | 1.00                                |
| <i>Dialister</i>        | 0.38                | -0.96  | 4.97e-04                              | 0.14                                | 1.63                | 0.49   | 0.10                                  | 1.00                                | 0.60                | -0.50  | 0.12                                  | 1.00                                |
| <i>Duncaniella</i>      | 0.89                | -0.11  | 0.04                                  | 1.00                                | 1.09                | 0.09   | 0.16                                  | 1.00                                | 0.97                | -0.03  | 0.66                                  | 1.00                                |
| <i>Enhydrobacter</i>    | 0.75                | -0.29  | 0.04                                  | 1.00                                | 0.86                | -0.16  | 0.16                                  | 1.00                                | 0.78                | -0.25  | 0.12                                  | 1.00                                |
| <i>Enterococcus</i>     | 2.12                | 0.75   | 1.33e-03                              | 0.38                                | 0.68                | -0.39  | 0.22                                  | 1.00                                | 1.83                | 0.60   | 0.02                                  | 1.00                                |
| <i>Eubacterium</i>      | 0.74                | -0.31  | 0.26                                  | 1.00                                | 3.05                | 1.12   | 4.80e-04                              | 0.14                                | 1.77                | 0.57   | 0.11                                  | 1.00                                |
| <i>Filifactor</i>       | 0.89                | -0.12  | 0.40                                  | 1.00                                | 1.83                | 0.60   | 2.84e-03                              | 0.80                                | 1.56                | 0.45   | 0.03                                  | 1.00                                |
| <i>Flavobacterium</i>   | 0.46                | -0.78  | 4.43e-03                              | 1.00                                | 2.35                | 0.85   | 0.01                                  | 1.00                                | 1.00                | 0.00   | 0.99                                  | 1.00                                |
| <i>Fretibacterium</i>   | 0.59                | -0.53  | 0.01                                  | 1.00                                | 1.29                | 0.25   | 0.21                                  | 1.00                                | 0.83                | -0.18  | 0.41                                  | 1.00                                |
| <i>Fusobacterium</i>    | 0.34                | -1.06  | 1.75e-03                              | 0.50                                | 7.54                | 2.02   | 6.45e-06                              | 1.82e-03                            | 1.41                | 0.35   | 0.45                                  | 1.00                                |
| <i>Gemella</i>          | 0.61                | -0.49  | 0.15                                  | 1.00                                | 4.26                | 1.45   | 3.72e-04                              | 0.11                                | 2.43                | 0.89   | 0.06                                  | 1.00                                |
| <i>Granulicatella</i>   | 1.28                | 0.25   | 0.49                                  | 1.00                                | 2.43                | 0.89   | 0.03                                  | 1.00                                | 2.00                | 0.69   | 0.10                                  | 1.00                                |
| <i>Haemophilus</i>      | 0.95                | -0.05  | 0.90                                  | 1.00                                | 11.66               | 2.46   | 1.04e-08                              | 2.96e-06                            | 8.32                | 2.12   | 6.43e-06                              | 1.82e-03                            |
| <i>Hydrogenophilus</i>  | 1.12                | 0.12   | 0.04                                  | 1.00                                | 0.93                | -0.08  | 0.14                                  | 1.00                                | 1.04                | 0.04   | 0.32                                  | 1.00                                |

|                                               |      |       |          |      |      |       |          |          |      |       |          |          |
|-----------------------------------------------|------|-------|----------|------|------|-------|----------|----------|------|-------|----------|----------|
| <i>Hyphomicrobium</i>                         | 1.00 | 0.00  |          | 1.00 | 1.08 | 0.07  | 0.16     | 1.00     | 1.15 | 0.14  | 0.04     | 1.00     |
| <i>Lactiplantibacillus</i>                    | 0.58 | -0.55 | 2.27e-03 | 0.64 | 1.05 | 0.05  | 0.71     | 1.00     | 0.55 | -0.59 | 0.01     | 1.00     |
| <i>Lactobacillus</i>                          | 0.34 | -1.09 | 1.55e-04 | 0.04 | 1.95 | 0.67  | 0.05     | 1.00     | 0.58 | -0.54 | 0.18     | 1.00     |
| <i>Lautropia</i>                              | 0.86 | -0.15 | 0.57     | 1.00 | 2.51 | 0.92  | 0.01     | 1.00     | 1.75 | 0.56  | 0.11     | 1.00     |
| <i>Lentilactobacillus</i>                     | 0.90 | -0.10 | 0.26     | 1.00 | 0.96 | -0.04 | 0.32     | 1.00     | 0.86 | -0.15 | 0.05     | 1.00     |
| <i>Leptotrichia</i>                           | 0.57 | -0.56 | 0.06     | 1.00 | 0.95 | -0.05 | 0.90     | 1.00     | 0.44 | -0.82 | 0.04     | 1.00     |
| <i>Leucobacter</i>                            | 1.17 | 0.15  | 0.03     | 1.00 | 0.84 | -0.17 | 0.05     | 1.00     | 1.01 | 0.01  | 0.87     | 1.00     |
| <i>Limosilactobacillus</i>                    | 0.53 | -0.63 | 0.04     | 1.00 | 0.84 | -0.18 | 0.62     | 1.00     | 0.41 | -0.90 | 0.03     | 1.00     |
| <i>Megasphaera</i>                            | 1.01 | 0.01  | 0.98     | 1.00 | 2.55 | 0.93  | 0.03     | 1.00     | 2.31 | 0.84  | 0.03     | 1.00     |
| <i>Metamycoplasma</i>                         | 0.62 | -0.48 | 0.06     | 1.00 | 2.07 | 0.73  | 0.01     | 1.00     | 1.16 | 0.15  | 0.66     | 1.00     |
| <i>Methylobacterium</i>                       | 0.83 | -0.18 | 0.40     | 1.00 | 0.51 | -0.68 | 0.03     | 1.00     | 0.37 | -1.01 | 1.06e-03 | 0.30     |
| <i>Neisseria</i>                              | 0.57 | -0.56 | 0.11     | 1.00 | 7.57 | 2.02  | 1.04e-05 | 2.96e-03 | 3.50 | 1.25  | 4.08e-03 | 1.00     |
| <i>Nitrospira</i>                             | 0.92 | -0.08 | 0.08     | 1.00 | 1.16 | 0.15  | 0.04     | 1.00     | 1.12 | 0.11  | 0.24     | 1.00     |
| <i>Nosocomiicoccus</i>                        | 0.95 | -0.05 | 0.37     | 1.00 | 0.96 | -0.04 | 0.32     | 1.00     | 0.85 | -0.17 | 0.05     | 1.00     |
| <i>Olsenella</i>                              | 0.68 | -0.38 | 0.01     | 1.00 | 1.20 | 0.18  | 0.23     | 1.00     | 0.78 | -0.25 | 0.13     | 1.00     |
| <i>Oribacterium</i>                           | 0.32 | -1.14 | 7.98e-05 | 0.02 | 2.27 | 0.82  | 0.04     | 1.00     | 0.59 | -0.53 | 0.17     | 1.00     |
| <i>Parcubacteria_genera_incertae_sedis</i>    | 0.85 | -0.16 | 0.44     | 1.00 | 1.64 | 0.49  | 0.04     | 1.00     | 1.37 | 0.32  | 0.23     | 1.00     |
| <i>Parvimonas</i>                             | 0.60 | -0.51 | 0.03     | 1.00 | 2.14 | 0.76  | 5.08e-04 | 0.14     | 0.98 | -0.02 | 0.94     | 1.00     |
| <i>Peptoniphilus</i>                          | 0.92 | -0.08 | 0.29     | 1.00 | 1.23 | 0.21  | 0.02     | 1.00     | 1.13 | 0.12  | 0.36     | 1.00     |
| <i>Peptostreptococcus</i>                     | 0.92 | -0.08 | 0.77     | 1.00 | 2.94 | 1.08  | 3.29e-03 | 0.93     | 1.84 | 0.61  | 0.10     | 1.00     |
| <i>Phenylobacterium</i>                       | 1.03 | 0.03  | 0.32     | 1.00 | 1.21 | 0.19  | 0.07     | 1.00     | 1.22 | 0.20  | 0.05     | 1.00     |
| <i>Phocaecicola</i>                           | 0.56 | -0.59 | 1.12e-03 | 0.32 | 0.83 | -0.18 | 0.31     | 1.00     | 0.48 | -0.73 | 2.43e-04 | 0.07     |
| <i>Porphyromonas</i>                          | 0.66 | -0.41 | 0.22     | 1.00 | 3.06 | 1.12  | 0.01     | 1.00     | 1.40 | 0.34  | 0.44     | 1.00     |
| <i>Pseudoramibacter</i>                       | 0.84 | -0.17 | 0.03     | 1.00 | 1.09 | 0.08  | 0.28     | 1.00     | 0.90 | -0.10 | 0.27     | 1.00     |
| <i>Rhodococcus</i>                            | 0.91 | -0.09 | 0.32     | 1.00 | 1.08 | 0.08  | 0.46     | 1.00     | 1.22 | 0.20  | 0.05     | 1.00     |
| <i>Rickettsia</i>                             | 0.96 | -0.04 | 0.71     | 1.00 | 2.56 | 0.94  | 9.87e-06 | 2.79e-03 | 2.44 | 0.89  | 7.49e-06 | 2.12e-03 |
| <i>Romboutsia</i>                             | 1.02 | 0.02  | 0.77     | 1.00 | 1.15 | 0.14  | 0.21     | 1.00     | 1.29 | 0.25  | 0.02     | 1.00     |
| <i>Rothia</i>                                 | 0.89 | -0.12 | 0.69     | 1.00 | 2.44 | 0.89  | 0.01     | 1.00     | 1.61 | 0.47  | 0.21     | 1.00     |
| <i>Saccharibacteria_genera_incertae_sedis</i> | 0.41 | -0.90 | 0.01     | 1.00 | 3.50 | 1.25  | 0.01     | 1.00     | 1.12 | 0.11  | 0.80     | 1.00     |
| <i>Scardovia</i>                              | 0.65 | -0.44 | 1.95e-03 | 0.55 | 1.23 | 0.21  | 0.05     | 1.00     | 0.68 | -0.39 | 0.03     | 1.00     |
| <i>Schaalia</i>                               | 0.72 | -0.33 | 0.28     | 1.00 | 2.14 | 0.76  | 0.04     | 1.00     | 1.25 | 0.22  | 0.54     | 1.00     |
| <i>Schwartzia</i>                             | 0.66 | -0.41 | 0.01     | 1.00 | 0.95 | -0.06 | 0.64     | 1.00     | 0.59 | -0.52 | 2.27e-03 | 0.64     |
| <i>Selenomonas</i>                            | 0.31 | -1.18 | 1.95e-04 | 0.06 | 1.86 | 0.62  | 0.12     | 1.00     | 0.46 | -0.78 | 0.05     | 1.00     |
| <i>Shuttleworthia</i>                         | 0.68 | -0.38 | 0.01     | 1.00 | 1.07 | 0.07  | 0.69     | 1.00     | 0.75 | -0.29 | 0.15     | 1.00     |
| <i>Sphaerochaeta</i>                          | 0.82 | -0.20 | 0.03     | 1.00 | 0.92 | -0.08 | 0.16     | 1.00     | 0.70 | -0.36 | 2.37e-03 | 0.67     |
| <i>Sphingomonas</i>                           | 0.89 | -0.11 | 0.50     | 1.00 | 3.57 | 1.27  | 8.31e-06 | 2.35e-03 | 3.59 | 1.28  | 2.18e-06 | 6.18e-04 |
| <i>Spiroplasma</i>                            | 1.14 | 0.13  | 0.04     | 1.00 | 1.27 | 0.24  | 0.02     | 1.00     | 1.40 | 0.34  | 2.37e-03 | 0.67     |

|                             |      |       |          |      |      |       |          |      |      |       |          |          |
|-----------------------------|------|-------|----------|------|------|-------|----------|------|------|-------|----------|----------|
| <i>Stenotrophomonas</i>     | 1.35 | 0.30  | 0.01     | 1.00 | 3.05 | 1.11  | 1.13e-04 | 0.03 | 4.57 | 1.52  | 9.01e-08 | 2.55e-05 |
| <i>Stomatobaculum</i>       | 0.42 | -0.87 | 3.46e-03 | 0.98 | 1.42 | 0.35  | 0.31     | 1.00 | 0.55 | -0.60 | 0.10     | 1.00     |
| <i>Streptococcus</i>        | 1.23 | 0.21  | 0.08     | 1.00 | 1.37 | 0.32  | 0.01     | 1.00 | 1.75 | 0.56  | 2.86e-05 | 0.01     |
| <i>Tannerella</i>           | 0.30 | -1.20 | 7.75e-06 | 0.00 | 1.73 | 0.55  | 0.06     | 1.00 | 0.48 | -0.73 | 0.03     | 1.00     |
| <i>Treponema</i>            | 0.24 | -1.42 | 2.21e-07 | 0.00 | 2.41 | 0.88  | 2.58e-03 | 0.73 | 0.51 | -0.68 | 0.06     | 1.00     |
| <i>Yersinia</i>             | 0.89 | -0.12 | 0.05     | 1.00 | 1.13 | 0.12  | 0.08     | 1.00 | 0.91 | -0.09 | 0.40     | 1.00     |
| <i>Zea</i>                  | 1.03 | 0.03  | 0.92     | 1.00 | 0.56 | -0.58 | 0.05     | 1.00 | 0.69 | -0.37 | 0.21     | 1.00     |
| (Unassigned)                | 1.00 | 0.00  | 0.99     | 1.00 | 1.51 | 0.41  | 0.18     | 1.00 | 1.21 | 0.19  | 0.48     | 1.00     |
| <i>Chryseobacterium</i>     | 1.20 | 0.18  | 0.45     | 1.00 | 1.95 | 0.67  | 0.03     | 1.00 | 2.17 | 0.77  | 0.01     | 1.00     |
| <i>Corynebacterium</i>      | 0.64 | -0.45 | 0.17     | 1.00 | 3.44 | 1.24  | 1.72e-03 | 0.49 | 1.82 | 0.60  | 0.08     | 1.00     |
| <i>Curvibacter</i>          | 1.13 | 0.12  | 0.46     | 1.00 | 1.10 | 0.10  | 0.57     | 1.00 | 1.36 | 0.31  | 0.08     | 1.00     |
| <i>Cutibacterium</i>        | 0.93 | -0.08 | 0.70     | 1.00 | 1.17 | 0.15  | 0.49     | 1.00 | 1.05 | 0.05  | 0.85     | 1.00     |
| <i>Enterococcus</i>         | 2.12 | 0.75  | 1.33e-03 | 0.38 | 0.68 | -0.39 | 0.22     | 1.00 | 1.83 | 0.60  | 0.02     | 1.00     |
| <i>Escherichia/Shigella</i> | 1.30 | 0.26  | 0.28     | 1.00 | 0.82 | -0.19 | 0.54     | 1.00 | 0.85 | -0.16 | 0.59     | 1.00     |
| <i>Lancefieldella</i>       | 1.00 | 0.00  | 0.99     | 1.00 | 1.54 | 0.43  | 0.28     | 1.00 | 1.45 | 0.37  | 0.32     | 1.00     |
| <i>Micrococcus</i>          | 0.79 | -0.24 | 0.30     | 1.00 | 1.16 | 0.14  | 0.51     | 1.00 | 0.93 | -0.07 | 0.76     | 1.00     |
| <i>Mogibacterium</i>        | 0.94 | -0.06 | 0.76     | 1.00 | 1.06 | 0.06  | 0.77     | 1.00 | 1.07 | 0.07  | 0.73     | 1.00     |
| <i>Peptostreptococcus</i>   | 0.92 | -0.08 | 0.77     | 1.00 | 2.94 | 1.08  | 3.29e-03 | 0.93 | 1.84 | 0.61  | 0.10     | 1.00     |
| <i>Prevotella</i>           | 0.94 | -0.06 | 0.62     | 1.00 | 1.03 | 0.03  | 0.87     | 1.00 | 0.84 | -0.17 | 0.31     | 1.00     |
| <i>Selenomonas</i>          | 0.31 | -1.18 | 1.95e-04 | 0.06 | 1.86 | 0.62  | 0.12     | 1.00 | 0.46 | -0.78 | 0.05     | 1.00     |
| <i>Stomatobaculum</i>       | 0.42 | -0.87 | 3.46e-03 | 0.98 | 1.42 | 0.35  | 0.31     | 1.00 | 0.55 | -0.60 | 0.10     | 1.00     |
| <i>Streptophyta</i>         | 0.51 | -0.67 | 0.07     | 1.00 | 0.71 | -0.34 | 0.41     | 1.00 | 0.56 | -0.58 | 0.16     | 1.00     |

Note. RC—regression coefficient. TP0: time-point 0 (upon admission to the hospital); TP1: time-point 1 (after a median of 5.0 days); TP2: time-point 2 (after a median of 12.0 days). This table demonstrates the genera that were differentially abundant between at least two time-points before the adjustment for multiple comparisons and after it. Genera that were differentially abundant after adjusting for multiple comparisons are indicated by red.
